# Supplementary material for: Improving a genetically encoded voltage indicator by modifying the cytoplasmic charge composition
Source: PubMed Central journal article supplement (PMC5557843; doi:10.1038/s41598-017-08731-2), 2017-08-15
Supplement: 41598_2017_8731_MOESM1_ESM.pdf [file 41598_2017_8731_MOESM1_ESM.pdf]

## **Improving a genetically-encoded voltage indicator by modifying the cytoplasmic charge composition**

- Sungmoo Lee<sup>1,2</sup>, Tristan Geiller<sup>1,3</sup>, Arong Jung<sup>1,4</sup>, Ryuichi Nakajima<sup>1</sup>, Yoon-Kyu Song<sup>2,5</sup> and Bradley J. Baker<sup>1,6</sup>
- 1. The Center for Functional Connectomics, Korea Institute of Science and Technology, Seoul, South Korea
- 2. Program in Nanoscience and Technology, Graduate School of Convergence Science and Technology, Seoul National University, Suwon, South Korea
- 3. Department of Psychology, Korea University, Seoul, South Korea
- 4. College of Life Sciences and Biotechnology, Korea University, Seoul, South Korea
- 5. Advanced Institutes of Convergence Technology, Suwon, South of Korea
- 6. Division of Bio-Medical Science and Technology, KIST School, Korea University of Science and Technology (UST), Seoul 02792, Republic of Korea

Correspondence should be addressed to Dr. Bradley Baker; [bradley.baker19@gmail.com](mailto:bradley.baker19@gmail.com)

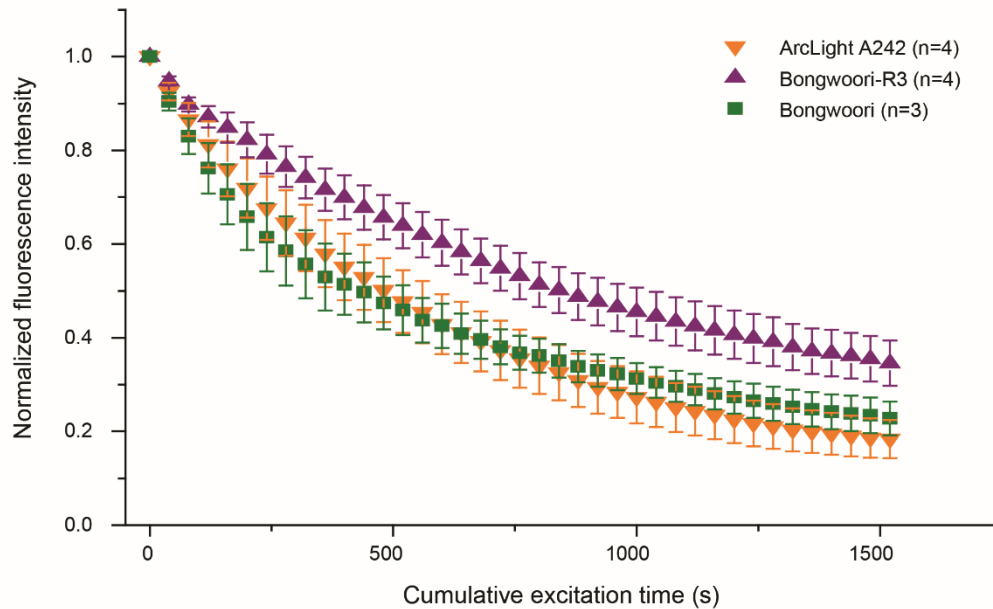

**Supplementary figure 1.** Normalized fluorescence intensities of three GEVIs showing their photobleaching rates in HEK 293 cells. ArcLight A242, Bongwoori or Bongwoori-R3 expressing cells were excited with a Xenon arc lamp by repeating a 40s light-on / 20s light-off trial. Fluorescence intensities were measured every 40s and fitted to an exponential decay function. Time constants for all three GEVIs were longer than 450s. Excitation light intensity was 1 mW/mm<sup>2</sup>.

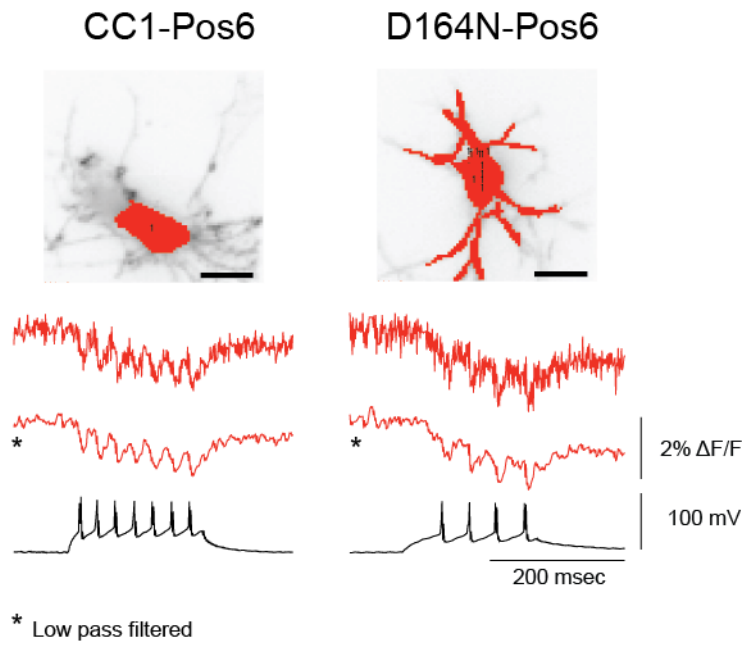

**Supplementary figure 2.** Optical imaging of evoked action potentials from cultured mouse hippocampal neurons with two untuned GEVIs, CC1-Pos6 and D164N-Pos6. For low-pass filtration, Gaussian filter was used. Upper trace is unfiltered and lower trace is low-pass filtered. Scale bar = 20 $\mu$ m.

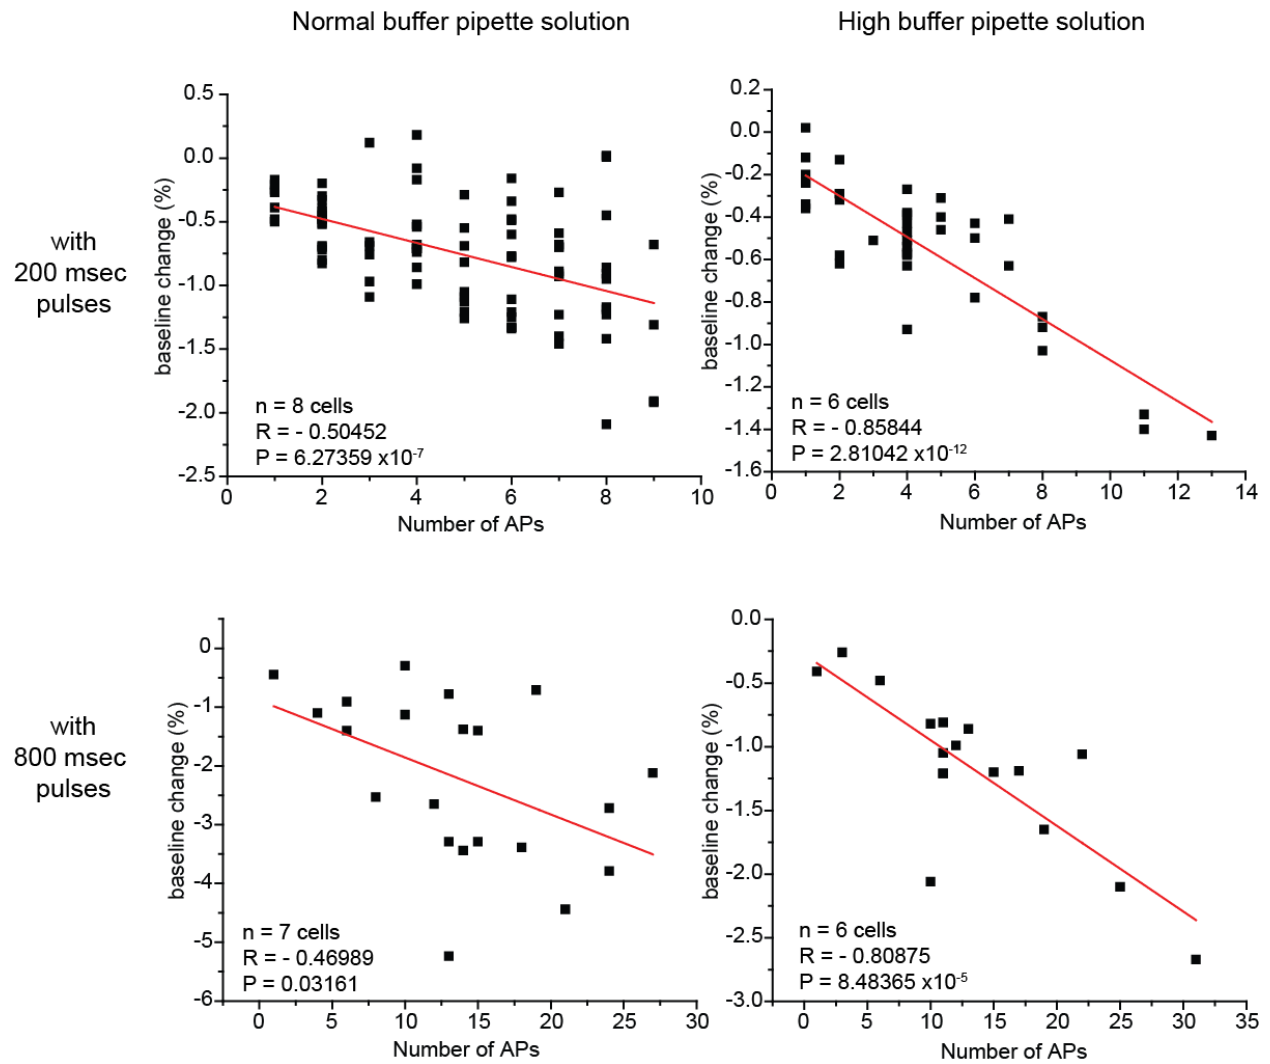

**Supplementary figure 3.** Baseline change in  $\Delta F/F$  measured with Bongwoori-R3 correlates with the number of evoked action potentials. The amplitude of baseline change of soma was plotted against the number of evoked action potentials. Pipette solution with normal buffering capacity (5 mM HEPES) or with high buffering capacity (100 mM HEPES) were used and plotted separately.

| Primer  | Sequence                                             | Construct      |
|---------|------------------------------------------------------|----------------|
| NEG1-A  | GAATATTTGACTCCCAACAGAGATGGGGGATCCCATGAG              | CC1-Neg1       |
| NEG1-B  | GGGATCCCCCATCTCTTGTTGGTGGGAGTCAAAATTTCTTGC           |                |
| NEG2-A  | GAATATTTGATTCACACGAGAAATGGGGGATCCCATGAG              | CC1-Neg2       |
| NEG2-B  | GGGATCCCCCATTTCTCTGTTGGGAATCAAAATTTCTTGC             |                |
| NEG3-A  | GAATATTTATGACCACCAAGAGATGGGGGATCCCATGAG              | CC1-Neg3       |
| NEG3-B  | GGGATCCCCCATCTCTTGTTGGTCAATAAAATTTCTTGC              |                |
| NEG4-AA | CAAGAATATTTATGATCACCAACACGAGGGGATCCCATGAGTAAAGG      | CC1-Neg4       |
| NEG4-BB | CCTTTACTCATGGGATCCCCCTGTTCTGTGATCATAAAATTTCTTGC      |                |
| POS5-A  | GAATATTAGGTCCCAACAAAGAATGGGGAGGCCTATGAG              | CC1-Pos5       |
| POS5-B  | AGGCCTCCCCATTTCTTGTTGGTGGACATAAATTTCTTGC             |                |
| POS6-A  | GAATATTAGATCCCACAAAGAAATGGGGAGGCCTATGAG              | CC1-Pos6       |
| POS6-B  | AGGCCTCCCCATCTTCTGTGGGATCTAAATTTCTTGC                |                |
| POST-A  | GAATATTTATAGACCAACGGATGGGGAGGCCTATGAG                | CC1-Pos7       |
| POST-B  | AGGCCTCCCCATCCGTTGGTGTCTATAAAATTTCTTGC               |                |
| POS8-AA | GCAAGAATATTTATTCAGGCCAACAGGGGAGGCCTATGAGTAAAGGAGAAG  | CC1-Pos8       |
| POS8-BB | CTTCTCCTTACTCATAGGCCTGCCCTTTGTTGCCTGGAATAAAATTTCTTGC |                |
| SM014A  | GGTTAGCAAGAATATTTATTCACCAACAAATGGGGGATCCCATGAG       | CC1-M240       |
| SM014B  | CTCATGGGATCCCCCATTTGTTGGTGGGAATAAAATTTCTTGCTAACC     |                |
| SM020A  | GCTGCGTGTGGTTATCTTAGCAAGAAATTTAGATCCCACAGAAGG        | Bongwoori-Pos6 |
| SM020B  | AAATATTTCTGTAGATAACACACGCAGCAATCTGGCCAACAC           |                |
| SM029A  | CTGTATTTCATGCTGAATTTAGGATTAAGGATATTGTC               | D164N-Pos6     |
| SM029B  | GGCAAATATCCTTAATCTAAATTCAGCATGAATAACAAG              |                |
| SM042A  | TTTAAATCCCACAAAAGATGGGGAGGCCTATGAGTAAAGGAG           | CC1-Pos6-Ks    |
| SM042B  | GGCTCCCCATCTTTTTGTGGGATTTAAATTTCTTGCTAACC            |                |
| SM030A  | CGCCGGAGAAGGCAGGAGAAGGCGCATGAGTAAAGGAGAAGAACCTTTC    | CC1-9Rs        |
| SM030B  | GCGCTTCTCCGCTTCTCCGGCGTAAATATTTCTTGCTAACC GAACC      |                |
| SM048A  | GAAAAAGAAGAAAAAGAAAAAGAGTAGTAAGGAGAAGAAGAACTTTTC     | CC1-9Ks        |
| SM048B  | CTTCTTTTCTTTTTCTTTTTCTTAAATATTTCTTGCTAACC GAACC      |                |
| SM049A  | GGAAGAAGAGGAAGAGGAGGAAGAAATAGTAAAGGAGAAGAAGAACTTTC   | CC1-9Es        |
| SM049B  | TTCTTCCTCTCTCTCTTCTCTTCTCAAATATTTCTTGCTAACC GAACC    |                |
| SM050A  | CTCATCTCCTCATCCTCTTCTCAATGAGTAAAGGAGAAGAAGAACTTTC    | CC1-9Ss        |
| SM050B  | TGAGGAAGAGGATGAGGAAGATGAGGAAATATTTCTTGCTAACC GAACC   |                |
| SM051A  | GCAGCAACAGCAGCAACAGCAGCAATGAGTAAAGGAGAAGAAGAACTTTC   | CC1-9Qs        |
| SM051B  | TTGCTGCTGTTGCTGCTGTTGCTGCTGAATATTTCTTGCTAACC GAACC   |                |
| SM055A  | GATGACGATGATGACGATGATGACATGAGTAAAGGAGAAGAAGAACTTTC   | CC1-9Ds        |
| SM055B  | ATCATCGTCATCATCGTCATCATCAATATTTCTTGCTAACC GAACCAC    |                |
| SM056A  | GCTGCCGCAGCTGCCGCAGCTGCCATGAGTAAAGGAGAAGAAGAACTTTC   | CC1-9As        |
| SM056B  | AGCTGCGGCAGCTGCGGCAGCGGCAATATTTCTTGCTAACC GAACCAC    |                |
| BR1A    | GGTTATCTTAGCAAGAATATTTAGGTCCCAACAAAGGGG              | Bongwoori-R1   |
| BR1B    | CCCCTGTTGGTGGGACCTAAATATTTCTTGCTAAGATAACC            |                |
| BR2A    | CTTAGCAAGAATATTTATAGGCACCAACAAAGGGGATCC              | Bongwoori-R2   |
| BR2B    | GGGATCCCCCTTGTGTTGGTCCTATAAAATATTTCTTGCTAAG          |                |
| BR3A    | GCAAGAATATTTATTCAGGCCAACAGGGGATCCCATGAG              | Bongwoori-R3   |
| BR3B    | CTCATGGGATCCCCCTTGTGCTGGAATAAAATATTTCTTGC            |                |
| BR4A    | GAATATTTATTCACAGGCAAGGGGATCCCATGAGTAAAGG             | Bongwoori-R4   |
| BR4B    | CCTTTACTCATGGGATCCCCCTTGTGCTGGAATAAAATATTC           |                |
| BR5A    | GAATATTTATTCACCAAAAGGGGATCCCATGAGTAAAGG              | Bongwoori-R5   |
| BR5B    | CCTTTACTCATGGGATCCCCCTTGTGTTGGTGGGAATAAAATATTC       |                |
| BR6A    | GAATATTTATTCACCAACAAAGGGGATCCCATGAGTAAAGG            | Bongwoori-R6   |
| BR6B    | CCTTTACTCATGGGATCCCCCTTGTGTTGGTGGGAATAAAATATTC       |                |
| BR7A    | GAATATTTATTCACCAACAAAGGGGAGCCCATGAGTAAAGGAG          | Bongwoori-R7   |
| BR7B    | CTCCTTACTCATGGGCCTCCTTGTGTTGGTGGGAATAAAATATTC        |                |
| BR8A    | CAACAAGGGGATAGGATGAGTAAAGGAGAAGAAGAACTTTCACTGG       | Bongwoori-R8   |
| BR8B    | CCTTTACTCATCCTATCCCCCTTGTGTTGGTGGGAATAAAATATTC       |                |

**Supplementary table 1.** Primer sequences used for PCR reactions to generate DNA gene constructs in this work.
